# The American Journal of Psychiatry

Official Journal of the American Psychiatric Association

## Officers 2015–2016

### President

Renée L. Binder, M.D.

### President-Elect

Maria A. Oquendo, M.D.

### Treasurer

Frank W. Brown, M.D.

### Secretary

Altha J. Stewart, M.D.

### Assembly

#### Speaker

Glenn A. Martin, M.D.

#### Speaker-Elect

Daniel J. Anzia, M.D.

#### Recorder

Theresa Miskimen, M.D.

### Office of the CEO and Medical Director

#### CEO and Medical Director

Saul Levin, M.D., M.P.A.

### Board of Trustees

Jeffrey Akaka, M.D.

Lama Bazzi, M.D.

R. Scott Benson, M.D.

Ronald M. Burd, M.D.

Stella Cai, M.D.

Brian Crowley, M.D.

Anita S. Everett, M.D.

Jeffrey L. Geller, M.D., M.P.H.

Dilip V. Jeste, M.D.

Jeffrey A. Lieberman, M.D.

Vivian B. Pender, M.D.

Gail E. Robinson, M.D.

Ravi N. Shah, M.D.

Paul Summergrad, M.D.

Melinda Young, M.D.

## Editorial Board

### Editor

Robert Freedman, M.D.

### Deputy Editors

David A. Lewis, M.D.

Robert Michels, M.D.

Daniel S. Pine, M.D.

A. John Rush, M.D.

Susan K. Schultz, M.D.

Carol A. Tamminga, M.D.

### Associate Editors

Alan Brown, M.D., M.P.H.

Tyrone Cannon, Ph.D.

Benjamin G. Druss, M.D., M.P.H.

Graham J. Emslie, M.D.

Daniel C. Javitt, M.D.

Bankole Johnson, M.D.

Ellen Leibenluft, M.D.

Joan L. Luby, M.D.

Constantine G. Lyketsos, M.D., M.H.S.

Helen S. Mayberg, M.D., F.R.C.P.C.

Barbara Milrod, M.D.

Terrie E. Moffitt, Ph.D.

Anita Thapar, M.B.B.Ch., F.R.C.Psych.,

Ph.D., F.Med.Sci.

Mauricio Tohen, M.D., Dr.PH., M.B.A.

Eduard Vieta, M.D., Ph.D.

Katherine L. Wisner, M.D., M.S.

Xin Yu, M.D.

### Editor Emerita

Nancy C. Andreasen, M.D., Ph.D.

### Former Editors

Amariah Brigham, M.D., 1844–1849

T. Romeyn Beck, M.D., 1849–1854

John P. Gray, M.D., 1854–1886

G. Alder Blumer, M.D., 1886–1894

Richard Dewey, M.D., 1894–1897

Henry M. Hurd, M.D., 1897–1904

Edward N. Brush, M.D., 1904–1931

Clarence B. Farrar, M.D., 1931–1965

Francis J. Braceland, M.D., 1965–1978

John C. Nemiah, M.D., 1978–1993

### Editorial Staff

#### Executive Editor

Michael D. Roy

#### Senior Editors

John J. Guardiano, Ph.D.

Jane Weaver

#### Production Manager

Susan Westrate

#### Assistant Editor

Angela Moore

#### Online Content Manager

Michael Pogachar

#### Editorial Support Services Manager

Heidi Koch

#### Editorial Assistant

Linda LaCour

#### Editorial Assistant/ Permissions Coordinator

Elizabeth Stern

#### Assistants to the Editors

Lois Lilienthal

Laura English

Rachel Hogg

Russell A. Scholl

### Publisher

Rebecca D. Rinehart

# The Residents' JOURNAL

## The American Journal of Psychiatry Residents' Journal

October 2015

Volume 10

Issue 10

### Inside

- 2** **Transcranial Direct Current Stimulation: Theory, Treatment of Major Depressive Disorder, and Other Neuropsychiatric Applications**  
Shan H. Siddiqi, M.D.,  
Nicholas T. Trapp, M.D.
- 5** **Painkillers That Cause Pain: Review of a Rising, Poorly Recognized Complication**  
Cornel N. Stanciu, M.D., Oliver M. Glass, M.D.
- 9** **Prevention of Dementia**  
Aarti U. Jerath, M.D., M.A.
- 12** **Delusional Memory in First-Episode Psychosis**  
Awais Aftab, M.D.
- 14** **She Loves Me Not? A Case of Erotomania**  
Marc Gunderson, M.D.
- 17** **Clinical Manual of Cultural Psychiatry, Second Edition**  
Reviewed by Siddarth Puri, M.D.
- 18** **Residents' Resources**

### IN THIS ISSUE



This month's issue of the *Residents' Journal* features articles on a variety of topics. Shan H. Siddiqi, M.D., and Nicholas T. Trapp, M.D., present findings on the use of transcranial direct current stimulation for cognitive enhancement and major depressive disorder. Cornel N. Stanciu, M.D., and Oliver M. Glass, M.D., analyze the literature on opioid-induced hyperalgesia, including data on distinguishing features, underlying biological mechanisms, and management. Aarti U. Jerath, M.D., M.A., examines modifiable, preventable, and unique factors that might delay onset of cognitive decline. Awais Aftab, M.D., provides discussion on a case of delusional memory in a 19-year-old patient with first-episode psychosis. Marc Gunderson, M.D., presents the case of erotomania in a middle-aged patient with a history of schizoaffective disorder and polysubstance use. Lastly, Siddarth Puri, M.D., offers a review of the book *Clinical Manual of Cultural Psychiatry*.

#### Editor-in-Chief

Rajiv Radhakrishnan, M.B.B.S., M.D.

#### Senior Deputy Editor

Katherine Pier, M.D.

#### Deputy Editor

Hun Millard, M.D., M.A.

#### Associate Editors

Rafik Sidaros, M.B.B.Ch.  
Janet Charoensook, M.D.

#### Staff Editor

Angela Moore

#### Editors Emeriti

Sarah B. Johnson, M.D.  
Molly McVoy, M.D.  
Joseph M. Cerimele, M.D.  
Sarah M. Fayad, M.D.  
Monifa Seawell, M.D.  
Misty Richards, M.D., M.S.

#### Editor-in-Chief

Rajiv Radhakrishnan, M.B.B.S., M.D.

#### Senior Deputy Editor

Katherine Pier, M.D.

#### Deputy Editor

Hun Millard, M.D., M.A.

#### Associate Editors

Rafik Sidaros, M.B.B.Ch.  
Janet Charoensook, M.D.

*The Residents' Journal* accepts manuscripts authored by medical students, resident physicians, and fellows. To submit your paper, please visit the manuscript submission site at [mc.manuscriptcentral.com/appi-ajp](http://mc.manuscriptcentral.com/appi-ajp) and either create an account or use your existing account. For manuscript type, select "Residents." Then follow the instructions to upload your manuscript. Residents who are interested in participating as Guest Section Editors should e-mail *The Residents' Journal* Editor-in-Chief Rajiv Radhakrishnan at [rajiv.radhakrishnan@yale.edu](mailto:rajiv.radhakrishnan@yale.edu).

*The Residents' Journal* is sent free-of-charge to all psychiatry residents. Anyone interested in being included on the distribution list should contact Angela Moore, *The Residents' Journal* staff editor at [ajp@psych.org](mailto:ajp@psych.org) with "Subscribe to Residents' Journal" in the subject line.

To access the complete Residents' Journal archives, visit [ajp.psychiatryonline.org/residents\\_journal](http://ajp.psychiatryonline.org/residents_journal)

# THE AMERICAN PSYCHIATRIC ASSOCIATION

1000 Wilson Blvd., Suite 1825, Arlington, VA 22209-3901  
(888) 357-7924 (toll-free inside the U.S. and Canada) / (703) 907-7300  
web site: [www.psychiatry.org](http://www.psychiatry.org) • e-mail: [apa@psych.org](mailto:apa@psych.org)

## Chairpersons of Councils, Committees, and Task Forces

### Standing Committees

|                             |                                |
|-----------------------------|--------------------------------|
| <b>Bylaws</b>               | Rebecca W. Brendel, M.D., J.D. |
| <b>Elections</b>            | Barry K. Herman, M.D.          |
| <b>Ethics</b>               | Ezra Griffith, M.D.            |
| <b>Finance and Budget</b>   | Alan F. Schatzberg, M.D.       |
| <i>Audit</i>                | Frank W. Brown, M.D.           |
| <i>Investment Oversight</i> | David Fassler, M.D.            |
| <b>Joint Reference</b>      | Maria A. Oquendo, M.D.         |
| <b>Membership</b>           | Rahn K. Bailey, M.D.           |
| <b>Nominating</b>           | Paul Summergrad, M.D.          |
| <b>Tellers</b>              | Catherine May, M.D.            |

### Councils

#### Council on Addiction Psychiatry

Frances R. Levin, M.D.

#### Council on Advocacy and Government Relations

Barry B. Perlman, M.D.

*Advocacy and Litigation Funding*

Jeffrey Akaka, M.D.

#### Council on Children, Adolescents, and Their Families

Joseph V. Penn, M.D.

*Agnes Purcell McGavin Award*

Robert Lee Hendren, M.D.

*Blanche F. Ittleson Research Award*

Michael Houston, M.D.

#### Council on Communications

Arshya Vahabzadeh, M.D.

#### Council on Geriatric Psychiatry

Robert P. Roca, M.D.

#### Council on Healthcare Systems and Financing

Harsh K. Trivedi, M.D.

*Reimbursement for Psychiatric Care*

Bruce J. Schwartz, M.D.

*RBRVS, Codes and Reimbursement*

Gregory G. Harris, M.D.

#### Council on International Psychiatry

Michelle Riba, M.D.

#### Council on Medical Education and Lifelong Learning

Richard F. Summers, M.D.

*American Leadership Fellowship Selection*

Leah J. Dickstein, M.D., M.A.

*APA Public Psychiatry Fellowship Selection Committee*

Derri Shtasel, M.D.

*APA/SAMHSA Minority Fellowship Selection and Advisory*

Roberto Lewis-Fernandez, M.D.

*Scientific Program*

Steven Koh, M.D.

*Vestermark Award Committee*

Jonathan F. Borus, M.D.

#### Council on Minority Mental Health and Health Disparities

Christina V. Mangurian, M.D.

#### Council on Psychiatry And Law

Steven K. Hoge, M.D.

*Isaac Ray/Human Rights Award*

Liza Hannah Gold, M.D.

*Judicial Action*

Marvin Stanley, M.D.

*Manfred S. Guttmacher Award*

David A. Lowenthal, M.D.

#### Council on Psychosomatic Medicine

##### (Consultation Liaison Psychiatry)

David F. Gitlin, M.D.

#### Council on Quality Care

Grayson Norquist, M.D.

*Mental Health Information Technology*

Steven Roy Daviss, M.D.

*Performance Measures*

Karen Pierce, M.D.

*Steering Committee on Practice Guidelines*

Michael J. Vergare, M.D.

#### Council on Research

Dwight L. Evans, M.D.

*Psychiatric Dimensions of Disasters*

Robert J. Ursano, M.D.

*Research Awards*

Matthew W. State, M.D.

# There's So Much More to AJP Than Meets the Page!

Visit *The American Journal of Psychiatry's* website on PsychiatryOnline for the following features!



## AJP in Advance

The very latest research advances!

At **AJP in Advance**, you can discover the following before their appearance in print:

### **The Brain's Response to Reward Anticipation and Depression in Adolescence: Dimensionality, Specificity, and Longitudinal Predictions in a Community-Based Sample**

A weak striatal response to reward anticipation was related to subthreshold or clinical depression in adolescents, and it predicted transition to depression 2 years later in previously healthy respondents.

### **Ziprasidone Augmentation of Escitalopram for Major Depressive Disorder: Efficacy Results From a Randomized, Double-Blind, Placebo-Controlled Study**

Adding ziprasidone to escitalopram increases the likelihood of treatment response after a lack of response to escitalopram alone. Adjunctive ziprasidone also has anxiolytic effects. Somnolence or fatigue is a common adverse event.



## AJP CME

Three articles in this issue form the basis of a short course with questions that can be answered for up to 1 *AMA PRA Category 1 Credit™* each by visiting <http://psychiatryonline.org/cme> and clicking on the "**American Journal of Psychiatry**" tab. CME credit is issued only **online**, and a paid subscription to AJP CME course program is required. This month's courses appear on pages 1167–1170.



## Have You Heard?

With AJP Audio you can listen to highlights of this issue. This month, Deputy Editor Susan K. Schultz, M.D., discusses psychiatric symptoms in Wilson's disease, interactions between inflammation and depression, circulating miRNA levels in schizophrenia, the relation of smoking status to later schizophrenia, development of posttraumatic stress disorder in Army service members following traumatic brain injury, and working in the Amish culture.

Also, visit the online edition of this month's Journal to view a video of Deputy Editor Daniel S. Pine, M.D., presenting highlights from the issue.



## Revisit the field's rich history!

### **50 years ago this month: "Popular Images of the President"**

Fred I. Greenstein, Ph.D., a student of political psychology, socialization, and leadership, explores popular conceptions of the U.S. President and sums up the research with a series of observations that remain of interest today. An example: "Citizens seem to perceive and evaluate the President as a person, rather than in terms of his policy commitments or his skill in the specialized tasks of leadership."

### **25 years ago this month: "Children's PTSD Reactions One Year After a Sniper Attack at Their School"**

Kathi Nader, D.S.W., and her colleagues find that the highest levels of exposure to the event were associated with more enduring and more severe symptoms. The authors recommend that the children who have the greatest exposure in such events be followed up closely to ensure that they receive the necessary treatment.
