## PERSPECTIVAS

### EDITORIALES

**1051 Moléculas y psiquiatría**

*Robert Freedman, M.D.*

**1052 Mecanismos moleculares y cronología de la activación cortical inmune en la esquizofrenia**

*Thomas M. Hyde, M.D., Ph.D., Rahul A. Bharadwaj, Ph.D.*

**1054 *CHRNA7* y *CHRFAM7A*: ¿Psicosis y Tabaco? ¡Culpe a los vecinos!**

*Schahram Akbarian, M.D., Ph.D., Marija Kundakovic, Ph.D.*

**1057 En busca de la base molecular del trastorno bipolar**

*Tadafumi Kato, M.D., Ph.D.*

**1059 ¿Biomarcadores circulantes del miARN en la esquizofrenia?**

*Murray J. Cairns, Ph.D.* **AUDIO**

**1062 Imágenes del movimiento de GABA en esquizofrenia**

*Anissa Abi-Dargham, M.D.*

### COMENTARIO

**1064 ¿Ketamina dentro de las neuronas?**

*Henry A. Lester, Ph.D., et al.*

### INTROSPECCIÓN

**1067 Rendirse**

*Karla Campanella, M.D., M.A.* **AUDIO**

### CONFERENCIA DE CASO CLÍNICO

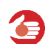

**1068 El espectro de síntomas psiquiátricos en la enfermedad de Wilson: consideraciones sobre el tratamiento y el pronóstico**

*Paula C. Zimbrea, M.D., Michael L. Schilsky, M.D.* **AUDIO • CLINICAL GUIDANCE**

### IMÁGENES EN PSIQUIATRÍA

**1073 Richard Dadd y el «golpe maestro del leñador duende»  
(The Fairy Feller's Master-Stroke)**

*Jonathan Davidson, M.B.B.S., F.R.C.Psych.*

### RESÚMENES Y RESEÑAS

**1075 Inflamación: La depresión aviva las llamas y se deleita con el calor**

*Janice K. Kiecolt-Glaser, Ph.D., et al.* **EDITORIAL • CME • AUDIO • CLINICAL GUIDANCE**

## NUEVAS INVESTIGACIONES

### ARTÍCULOS

**1092 Consumo de tabaco y esquizofrenia en cohortes de población de mujeres y hombres suecos: Un estudio prospectivo, en co-relativos de control,**

*Kenneth S. Kendler, M.D., et al.* **EDITORIALS • CME • AUDIO**

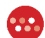

**1101 Evaluación longitudinal prospectiva del efecto del traumatismo craneoencefálico por causa de despliegue militar, sobre trastornos de estrés posttraumático y relacionados: Resultados del estudio Army STARRS (estudio del ejército para evaluar riesgo y resiliencia en los miembros del servicio)**

*Murray B. Stein, M.D., M.P.H., et al.* **CME • AUDIO • CLINICAL GUIDANCE**

**1112 Mecanismos moleculares y cronología de la activación cortical inmune en esquizofrenia**

*David W. Volk, M.D., Ph.D., et al.* **EDITORIALS**

- 1122** Micro ARNs de *CHRNA7* y *CHRFAM7A*: Co-localizados y sus niveles de expresión alterados en la corteza prefrontal dorsolateral postmortem en trastornos psiquiátricos severos  
Yasuto Kunii, M.D., Ph.D., et al. EDITORIALS
- 1131** Secuenciación del transcriptoma del cíngulo anterior en trastorno bipolar: desregulación de los receptores acoplados a proteínas G  
Cristiana Cruceanu, B.Sc., et al. EDITORIALS
- 1141** Detección de niveles circulantes de miARN en esquizofrenia  
Hui Wei, Ph.D., et al. EDITORIALS • AUDIO
- 1148** Medición in vivo de la transmisión de GABA en sujetos sanos y en pacientes con esquizofrenia  
W. Gordon Frankle, M.D., M.B.A., et al. EDITORIALS

## COMUNICADOS Y ACTUALIZACIONES

### CARTAS AL EDITOR

- 1160** Hipogonadismo central post TCE y TEPT  
Kayla H. Isaacs, B.S., Thomas D. Geraciotti, M.D.
- 1160** Un estudio de caso de resultados clínicos y neuroimágenes posteriores a la estimulación magnética transcraneana repetitiva para el trastorno por acumulación  
Gretchen J. Diefenbach, Ph.D., et al.
- 1162** Distonía de inicio súbito en un paciente que toma asenapina: Interacción entre el metabolismo de la asenapina y el ciprofloxacín  
Kathryn K. Ridout, M.D., Ph.D., et al.

### RESEÑA BIBLIOGRÁFICA

- 1164** The Last and Greatest Battle: Finding the Will, Commitment, and Strategy to End Military Suicides [La última y más grande batalla: Encontrando la voluntad, el compromiso y la estrategia para acabar con los suicidios militares]  
M. David Rudd, Ph.D., A.B.B.P.
- 1164** Handbook on Obsessive-Compulsive and Related Disorders [Manual de trastornos obsesivo-compulsivos y otros relacionados]  
Jennifer Lissemore, B.Sc., et al.
- 1165** Cruel Attachments: The Ritual Rehab of Child Molesters in Germany [Apegos crueles: La rehabilitación ritual de los pederastas en Alemania]  
Richard Balon, M.D.

## OTROS TEMAS DE INTERÉS

### 1167 Educación Médica Continuada

**Cubierta:** [While chromosomes themselves have not yet yielded up the keys to diagnosis and treatment of mental illness as they have for many other illnesses, molecular mechanisms of mental illness are being identified. Research presented in this issue provides detailed examinations of how specific genes work in the brain and act to support its function].

Article content that addresses **Core Competencies**, defined by the Accreditation Council of Graduate Medical Education and the American Board of Medical Specialties, is indicated by the following symbols:

-  Professionalism
-  Patient Care and Procedural Skills
-  Medical Knowledge
-  Practice-Based Learning and Improvement
-  Interpersonal and Communication Skills
-  Systems-Based Practice.

More information is available at [www.abms.org/maintenance\\_of\\_certification/MOC\\_competencies.aspx](http://www.abms.org/maintenance_of_certification/MOC_competencies.aspx)

### La Tabla de Contenidos y resúmenes de Este Número Está Disponible en Español

(This issue's Table of Contents and abstracts are available in Spanish)

Translation presented in collaboration with the Office of Global Health, Rutgers-Robert Wood Johnson Medical School

Support for this effort provided by ACTA Colombia.

#### Translation courtesy of

**Sergi Casals, M.A.**, Garuna, Medellín, Colombia ([www.garunaeditors.com](http://www.garunaeditors.com))

**Carlos Lopez Jaramillo, M.D.**, Universidad de Antioquia, Medellín, Colombia

**Javier I. Escobar, M.D., M.Sc.**, Rutgers-Robert Wood Johnson Medical School

**AUDIO** Highlighted in AJP Audio, a downloadable .mp3 file available at [ajp.psychiatryonline.org](http://ajp.psychiatryonline.org)

**CME** A course covering the content of this article is available online for paid subscribers to the AJP CME Course program

**EDITORIAL** Discussed in one of the issue's editorials

**GUÍAS CLÍNICAS** Clinical Guidance provided on the English table of contents

**VIDEO** Highlighted online by Deputy Editor Daniel S. Pine, M.D.

## Inflamación: La depresión aviva las llamas y se deleita con el calor

Janice K. Kiecolt-Glaser, Ph.D., Heather M. Derry, M.A., Christopher P. Fagundes, Ph.D.

La depresión y la inflamación se alimentan mutuamente. La inflamación juega un papel clave en la patogénesis de la depresión para un subconjunto de individuos deprimidos; la depresión también favorece mayores respuestas de las citoquinas a los factores estresantes y patógenos que no parecen ser habituales. Por consiguiente, las decisiones de tratamiento pueden estar basadas en las preguntas de cómo (vías) y para quién (predisposiciones) existen estos enlaces entre inflamación y depresión, que son el tema de este artículo. Los factores estresantes y los patógenos, cuando están combinados con factores de predisposición (moderadores como adversidades en la infancia y obesidad), pueden conducir a respuestas inflamatorias exageradas o prolongadas. Las conductas de enfermedad resultantes (por ejemplo, dolor, alteraciones del sueño), los síntomas depresivos y las conductas de salud negativas (p. ej., mala dieta, estilo de vida sedentario) pueden actuar como vías mediadoras que conducen a una inflamación y una depresión mayores e incontroladas. Tanto la depresión como las adversidades en la infancia, los factores estresantes y la dieta, pueden influenciar el microbioma intestinal y aumentar la permeabilidad intes-

tinal, otra vía para las respuestas inflamatorias aumentadas. Las respuestas inflamatorias mayores, más frecuentes o más prolongadas podrían tener consecuencias negativas para la salud mental y física. En la práctica clínica, la inflamación ofrece una guía hacia posibles objetivos del manejo de síntomas al señalar la reactividad a ciertas estrategias terapéuticas. Por ejemplo, un tema en la investigación con antagonistas de las citoquinas, con ácidos grasos de Omega-3 y con el ejercicio es que las intervenciones anti-inflamatorias tienen un impacto substancialmente mayor en el estado de ánimo de individuos con inflamación aumentada. Así, cuando la inflamación y la depresión se dan simultáneamente, tratarlas en tándem puede favorecer la recuperación y reducir el riesgo de recurrencia. Los enlaces bidireccionales entre la depresión, la inflamación y la enfermedad sugieren que los tratamientos efectivos de la depresión podrían tener un impacto de amplias consecuencias en el estado de ánimo, la inflamación y la salud.

*(Am J Psychiatry 2015; 172:1075–1091)*

## Consumo de tabaco y esquizofrenia en cohortes de población de mujeres y hombres suecos: Un estudio prospectivo, en co-relativos de control

Kenneth S. Kendler, M.D., Sara Larsson Lönn, Ph.D., Jan Sundquist, M.D., Ph.D., Kristina Sundquist, M.D., Ph.D.

**Objetivo:** El objetivo de este estudio fue aclarar las causas de la asociación entre esquizofrenia y consumo de tabaco.

**Método:** Utilizando el modelo de los riesgos proporcionales de Cox y el de control de co-relativos, los autores predijeron el futuro riesgo de un diagnóstico de esquizofrenia o psicosis no afectiva a partir del estatus de consumo de tabaco de 1.413.849 mujeres y 233.879 hombres, de los registros de nacimiento y de conscripción suecos respectivamente.

**Resultados:** Se evaluó el consumo de tabaco en mujeres con una edad media de 27 años y en hombres con una edad media de 18. La edad media al final del seguimiento fue de 46 años para las mujeres y de 26 años para los hombres. Los cocientes de riesgo de que la esquizofrenia apareciera por primera vez fueron elevados para los individuos que fumaban poco: tanto para mujeres (2,21 [IC 95%=1,90–2,56]) como para hombres (2,15 [IC 95%=1,25–3,44]), y también para los que fumaban mucho: 3,45 [IC 95%=2,95–4,03] para mujeres y 3,80 [IC 95%=1,19–6,60] para hombres. Estas asociaciones no disminuyeron cuando se censuraron los casos en que la esquizofrenia se inició 3-5 años después de la evaluación del consumo de tabaco. Cuando se controlaron la edad, el estatus socio-económico y el abuso de drogas, los cocientes de riesgo disminuyeron sólo modestamente en ambas muestras. Las mujeres que fumaron hasta avanzado el embarazo tuvieron un riesgo mucho más alto de es-

quizofrenia que las que dejaron de fumar temprano. Los cocientes de riesgo que predicen la psicosis no afectiva en la población general, en primos, en medios hermanos y en hermanos completos discordantes en consumo intenso de tabaco fueron, respectivamente, 2,67, 2,71, 2,54, y 2,18. Un modelo que utiliza pares de relativos predijo un cociente de riesgo de 1,69 (IC 95%=1,17–2,44) para psicosis no afectiva en el miembro que fumaba mucho de los pares de gemelos monocigóticos discordantes.

**Conclusiones:** El consumo de tabaco predice prospectivamente el riesgo de esquizofrenia. Esta asociación no se deriva del inicio del consumo de tabaco durante un pródromo de esquizofrenia y demuestra una clara relación dosis-respuesta. Mientras que las variables epidemiológicas de confusión alcanzan a explicar muy poco de esta asociación, parte de la misma se deriva de factores de riesgo familiares/genéticos comunes. Sin embargo, en hermanos completos, especialmente en gemelos monocigóticos discordantes por el consumo de tabaco, el riesgo de psicosis no afectiva es perceptiblemente mayor en el hermano que fuma. Estos resultados pueden servir para evaluar la plausibilidad de varias hipótesis etiológicas sobre la asociación consumo de tabaco-esquizofrenia.

(*Am J Psychiatry* 2015; 172:1092–1100)

# Evaluación longitudinal prospectiva del efecto del traumatismo craneoencefálico por causa del despliegue militar, sobre trastornos de estrés postraumático y relacionados: Resultados del estudio *Army STARRS* (estudio del ejército para evaluar riesgo y resiliencia en los miembros del servicio)

Murray B. Stein, M.D., M.P.H., Ronald C. Kessler, Ph.D., Steven G. Heeringa, Ph.D., Sonia Jain, Ph.D., Laura Campbell-Sills, Ph.D., Lisa J. Colpe, Ph.D., M.P.H., Carol S. Fullerton, Ph.D., Matthew K. Nock, Ph.D., Nancy A. Sampson, B.A., Michael Schoenbaum, Ph.D., Xiaoying Sun, M.S., Michael L. Thomas, Ph.D., Robert J. Ursano, M.D., On behalf of the Army STARRS collaborators

**Objetivo:** El traumatismo craneoencefálico (TCE) se reconoce cada vez más como un factor nocivo para la salud mental y los resultados funcionales. El objetivo del presente estudio fue examinar la fuerza y la especificidad de la asociación entre el TCE por causa de despliegue militar y los subsiguientes trastornos de estrés postraumático y relacionados entre personal del ejército norteamericano.

**Método:** Se realizó un cuestionario longitudinal prospectivo de soldados en tres equipos de brigada de combate 1-2 meses antes de un despliegue de 10 meses a Afganistán (T0), después del re-despliegue a Estados Unidos (T1), aproximadamente 3 meses después (T2), y aproximadamente 9 meses más tarde (T3). Los resultados de interés fueron la prevalencia, 30 días después del despliegue, de trastorno por estrés postraumático (TEPT), episodio depresivo mayor, trastorno de ansiedad generalizada y comportamientos suicidas, igual que la presencia y severidad de síntomas de TEPT post-despliegue.

**Resultados:** Se obtuvo información completa de 4.645 soldados. Aproximadamente uno de cada cinco soldados re-

portó exposición a TCE(s) leves (18,0%) o más que leves (1,2%) durante el despliegue índice. Incluso después de ajustar otros seis factores de riesgo (p.ej., estatus de salud mental antes del despliegue, severidad del estrés por el despliegue, historial previo de TCE), el TCE por causa del despliegue se asoció a probabilidades ajustadas elevadas de TEPT y trastorno de ansiedad generalizada en T2 y T3, y de episodio depresivo mayor en T2. De modo similar, el riesgo de comportamiento suicida en T2 se encontró elevado, pero dicha asociación no alcanzó a tener significación estadística.

**Conclusiones:** Los hallazgos resaltan la importancia de los esfuerzos de vigilancia para identificar a soldados que han sufrido TCEs y por lo tanto están en riesgo de un número de resultados adversos para la salud mental después del despliegue, incluyendo el TEPT entre otros. Es necesario dilucidar los mecanismos que explican estas asociaciones, para desarrollar programas de prevención e intervención efectivos.

(*Am J Psychiatry* 2015; 172:1101–1111)

## Mecanismos moleculares y cronología de la activación cortical inmune en esquizofrenia

David W. Volk, M.D., Ph.D., Anjani Chitrapu, B.S., Jessica R. Edelson, M.S., Kaitlyn M. Roman, B.S., Annie E. Moroco, B.S., David A. Lewis, M.D.

**Objetivo:** En esquizofrenia normalmente se reportan anomalías relacionadas con el sistema inmunitario, incluyendo altos niveles de ARNm para el factor de protección viral mediado por la proteína transmembrana inducida por interferón (IFITM) en la corteza prefrontal. Los autores se propusieron aclarar si los niveles altos de ARNm en el IFITM y otras alteraciones relacionadas con el sistema inmunológico en la corteza prefrontal son consecuencia de una cascada molecular constante que contribuye a la activación inmunológica o del reflejo de una respuesta inadaptada duradera a un trauma intrauterino relacionado con el sistema inmunológico.

**Método:** Se utilizó la reacción en cadena de la polimerasa cuantitativa para medir los niveles de ARNm para citocinas relacionadas con el sistema inmunológico y los reguladores transcripcionales, incluyendo los que regulan la expresión de IFITM, en la corteza prefrontal de 62 pacientes con esquizofrenia y 62 sujetos sanos y de ratones adultos expuestos prenatalmente a activación inmunológica materna o en la edad adulta al estimulante inmunológico poli (I:C) .

**Resultados:** Los sujetos con esquizofrenia tuvieron niveles de ARNm marcadamente más altos para la interleucina 6 (IL-

6) (+379%) e interferón- $\beta$  (+29%), que inducen la expresión de IFITM; niveles de ARNm más bajos para Schnurri-2 (-10%), un inhibidor transcripcional que baja la expresión de IFITM; y niveles de ARNm más altos para el factor nuclear- $\kappa$ B (+86%), un factor de transcripción crítico que media la regulación de las citocinas de la expresión genética relacionada con el sistema inmunitario. En los ratones adultos que recibieron inyecciones diarias de poli (I:C), pero no en los hijos con exposición prenatal a la activación inmunológica materna, los niveles de ARNm de la corteza frontal también fueron marcadamente elevados para el IFITM (+304%), para múltiples citocinas incluyendo la IL-6 (+493%), y para el factor nuclear- $\kappa$ B (+151%).

**Conclusiones:** Estos datos sugieren que los niveles más altos de ARNm en el IFITM de la corteza prefrontal en esquizofrenia pueden ser atribuibles a la activación de múltiples marcadores inmunológicos en la edad adulta, pero no en el periodo prenatal, y que es necesaria más investigación sobre el papel potencial de estos y otros marcadores inmunológicos como objetivos terapéuticos en esquizofrenia.

(*Am J Psychiatry* 2015; 172:1112–1121)

## Micro ARNs de CHRNA7 y CHRFAM7A : Co-localizados y sus niveles de expresión alterados en la corteza prefrontal dorsolateral postmortem en trastornos psiquiátricos severos

Yasuto Kunii, M.D., Ph.D., Wenyu Zhang, Ph.D., Qing Xu, Thomas M. Hyde, M.D., Ph.D., Whitney McFadden, Joo Heon Shin, Ph.D., Amy Deep-Soboslay, M.Ed., Tianzhang Ye, Chao Li, Ph.D., Joel E. Kleinman, M.D., Ph.D., Kuan Hong Wang, Ph.D., Barbara K. Lipska, Ph.D.

**Objetivo:** El CHRNA7, receptor nicotínico neuronal para la acetilcolina del subtipo  $\alpha 7$  ( $\alpha 7$  nAChR), está implicado en la cognición a través de la modulación interneuronal de la señalización de dopamina y glutamato. El CHRNA7 y su gen quimérico parcialmente duplicado CHRFAM7A han estado implicados en la esquizofrenia a través de estudios de ligamiento y asociación.

**Método:** Se midió la expresión del ARNm de los genes CHRNA7 y CHRFAM7A en la corteza prefrontal postmortem en más de 700 sujetos, incluyendo pacientes con esquizofrenia, trastorno bipolar y depresión mayor, y en sujetos normales de comparación. Se exploraron los efectos de los antipsicóticos y la nicotina, así como las asociaciones de los SNPs en CHRNA7 con la expresión genética. Se utilizó hibridación fluorescente in-situ para examinar la co-expresión de ambas transcripciones en la corteza humana.

**Resultados:** La expresión de CHRFAM7A y los cocientes de CHRFAM7A/CHRNA7 fueron más altos en la etapa fetal que en la vida postnatal, mientras que la expresión de CHRNA7 fue relativamente estable. La expresión de CHRFAM7A fue significativamente elevada en todos los grupos de diagnósti-

co, mientras que la expresión de CHRNA7 fue reducida en el grupo de esquizofrenia y aumentada en el grupo de depresión mayor, comparado con el grupo de comparación. Los cocientes CHRFAM7A/CHRNA7 fueron significativamente elevados en los grupos de esquizofrenia y de trastorno bipolar comparado con el grupo de comparación. No hubo ningún efecto de la nicotina ni los antipsicóticos, ni ninguna asociación de los SNPs en el gen CHRNA7 con la expresión. Los ARNm del CHRNA7 y el CHRFAM7A fueron expresados en los mismos núcleos neuronales de la neocorteza humana.

**Conclusiones:** Estos datos demuestran una expresión fetal preferencial del CHRFAM7A en la corteza prefrontal humana y sugieren anomalías en los cocientes CHRFAM7A/CHRNA7 en esquizofrenia y trastorno bipolar, principalmente debido a la sobre-expresión del CHRFAM7A. Dado que dichas transcripciones están co-expresadas en un subconjunto de neuronas corticales humanas y pueden interactuar para alterar la función de los nAChRs, estos resultados apoyan el concepto de la función aberrante de los nAChRs en la enfermedad mental.

(*Am J Psychiatry* 2015; 172:1122–1130)

## Secuenciación del transcriptoma del cíngulo anterior en trastorno bipolar: Desregulación de los receptores acoplados a proteínas G

Cristiana Cruceanu, B.Sc., Powell Patrick Cheng Tan, B.Sc., Sanja Rogic, Ph.D., Juan Pablo Lopez, B.Sc., Susana Gabriela Torres-Platas, Ph.D., Carolina O. Gigek, Ph.D., Martin Alda, M.D., F.R.C.P.C., Guy A. Rouleau, M.D., Ph.D., Paul Pavlidis, Ph.D., Gustavo Turecki, M.D., Ph.D.

**Objetivo:** La desregulación de la expresión genética en el cerebro se ha asociado con el trastorno bipolar por medio de estudios de expresión de micromatrices y genes candidatos, pero sigue habiendo preguntas sobre la desregulación isomorfa específica y el papel de los ARNs no codificantes, cuya importancia en el cerebro ha sido sugerida, aunque todavía no se ha caracterizado para el trastorno bipolar.

**Método:** Los autores utilizaron secuenciación de ARM, una poderosa técnica que captura la complejidad de la expresión genética, en tejidos postmortem de la corteza cíngulada anterior de 13 sujetos con trastorno bipolar y 13 sujetos de comparación apareados con estos casos. Se computó la expresión diferencial, y se detectó un patrón global de regulación por decremento, con 10 transcripciones significativas a una tasa de falso descubrimiento de  $\leq 5\%$ . Tiene importancia observar que los 10 genes también fueron replicados en un conjunto de datos de secuenciación de ARN (N=61) de la corteza cíngulada anterior.

**Resultados:** Entre los resultados más significativos estuvieron los genes de clase A que codifican a los receptores acoplados a proteínas G : SSTR2 (receptor de somatostatina 2),

CHRM2 receptor colinérgico muscarínico 2) y RXFP1 (receptor de péptido de la familia de la relaxina/insulina de tipo I). Un análisis de ontología de genes de todo el conjunto de genes expresados diferencialmente reveló una sobre-representación de genes implicados en la regulación de receptores acoplados a proteínas G. Se hizo un seguimiento de los genes principales, mirando especialmente el efecto del tratamiento con estabilizadores del ánimo comúnmente prescritos en el trastorno bipolar, que mostró que estas medicaciones modulan la expresión de los genes candidatos.

**Conclusiones:** Utilizando la secuenciación de ARN en el cerebro bipolar postmortem, se identificó un perfil interesante de la desregulación de receptores acoplados a proteínas G, se indicaron varios genes nuevos del trastorno bipolar y se caracterizó el transcriptoma no codificante en trastorno bipolar. Estos hallazgos tienen implicaciones importantes con referencia a la precisión del conocimiento que tenemos del cerebro en el trastorno bipolar, así como para identificar nuevas vías para el tratamiento con medicamentos.

(*Am J Psychiatry* 2015; 172:1131–1140)



## Detección de niveles circulantes de miARN en esquizofrenia

Hui Wei, Ph.D., Yanbo Yuan, M.D., Sha Liu, Ph.D., Cheng Wang, Ph.D., Fude Yang, M.D., Zheng Lu, M.D., Chuanyue Wang, M.D., Hong Deng, M.D., Jinping Zhao, M.D., Yan Shen, M.S., Chenyu Zhang, Ph.D., Xin Yu, M.D., Qi Xu, M.D., Ph.D.

**Objetivo:** El diagnóstico de esquizofrenia actualmente depende de criterios basados en síntomas y carece de indicadores objetivos. En este estudio, los autores investigaron si el miARN circulante puede servir como biomarcador diagnóstico para la esquizofrenia.

**Método:** Se perfilaron miARNs de plasma globales en una cohorte de prueba de 164 pacientes con esquizofrenia y 187 sujetos control, utilizando secuenciación Solexa, el conjunto TaqMan de densidad baja y análisis químicos cuantitativos de reacción en cadena de la polimerasa con transcriptasa inversa (qRT-PCR). Después se validaron los miARNs capturados por medio de ensayos químicos qRT-PCR en una cohorte independiente de 400 pacientes con esquizofrenia, 213 sujetos de control y 162 pacientes con trastornos psiquiátricos diferentes a la esquizofrenia; a los 400 pacientes con esquizofrenia se les hizo un estudio de seguimiento

de 12 meses del tratamiento normal con un antipsicótico atípico (risperidona y aripiprazol).

**Resultados:** El monitoreo de miARN en plasma global reveló ocho miARNs que fueron regulados por incremento en esquizofrenia, tal como lo revelaron las dos plataformas de ensayos químicos. Los análisis qRT-PCR mostraron la regulación por incremento de miR-130b y miR-193a-3p en esquizofrenia, pero no en trastornos diferentes a la esquizofrenia.

**Conclusiones:** La regulación por incremento de miR-130b y miR-193a-3p es un biomarcador independiente de estado para la esquizofrenia, y estos dos miARNs podrían utilizarse para desarrollar una herramienta de diagnóstico de la esquizofrenia.

(*Am J Psychiatry* 2015; 172:1141–1147)

## Medición in vivo de la transmisión de GABA en sujetos sanos y en pacientes con esquizofrenia

W. Gordon Frankle, M.D., M.B.A., Raymond Y. Cho, M.D., Konasale M. Prasad, M.D., N. Scott Mason, Ph.D., Jennifer Paris, M.Ed., M.S.L., Michael L. Himes, B.S., Christopher Walker, M.S., David A. Lewis, M.D., Rajesh Narendran, M.D.

**Objetivo:** Los estudios postmortem en esquizofrenia revelan alteraciones en productos genéticos que regulan la liberación y la persistencia extracelular de GABA. Sin embargo, los resultados de los estudios in vivo en esquizofrenia que miden el tejido de GABA total con espectroscopia por resonancia magnética (ERM) han sido inconsistentes. Ni los estudios postmortem ni los estudios con ERM han abordado directamente las propiedades fisiológicas de la neurotransmisión de GABA. El presente estudio aborda este tema a través de un paradigma innovador de tomografía por emisión de positrones (TEP).

**Método:** El ligamento de [11C]flumazenil, una radiosonda de TEP específica de las benzodiazepinas, se midió antes y después de la administración de tiagabina (0,2 mg/kg de peso corporal), un inhibidor de los transportadores de membrana de GABA (GAT1), en 17 pacientes con esquizofrenia que no estaban tomando medicación y 22 sujetos sanos de comparación. El GABA extracelular aumentado a través de la inhibición de GAT1, incrementa la afinidad de los receptores GABAA para los ligandos de las benzodiazepinas, detectados como un aumento del volumen de distribución (VT) del tejido [11C]flumazenil.

**Resultados:** El VT de [11C]flumazenil aumentó significativamente en todas las regiones cerebrales corticales en el grupo sano de comparación, pero no en el grupo con esquizofrenia. Esta falta de efecto fue más prominente en el grupo con esquizofrenia que no tomaba antipsicóticos. En este subgrupo, el  $\Delta$ VT [11C]flumazenil en el lóbulo temporal medio estuvo correlacionado con síntomas positivos, y el VT [11C]flumazenil de base en el lóbulo temporal medio estuvo correlacionado negativamente con el aprendizaje visual. En el grupo sano de comparación, pero no en el grupo con esquizofrenia, el  $\Delta$ VT [11C]flumazenil estuvo asociado positivamente con la actividad oscilatoria en la banda gamma.

**Conclusiones:** Este estudio demuestra, por primera vez, una deficiencia in vivo en la transmisión de GABA en esquizofrenia, prominente sobretodo en individuos que no toman antipsicóticos. La deficiencia en la transmisión de GABA parece estar relacionada con síntomas clínicos, con alteraciones en oscilaciones corticales, y con la cognición.

(*Am J Psychiatry* 2015; 172:1148–1159)
