# The American Journal of Psychiatry

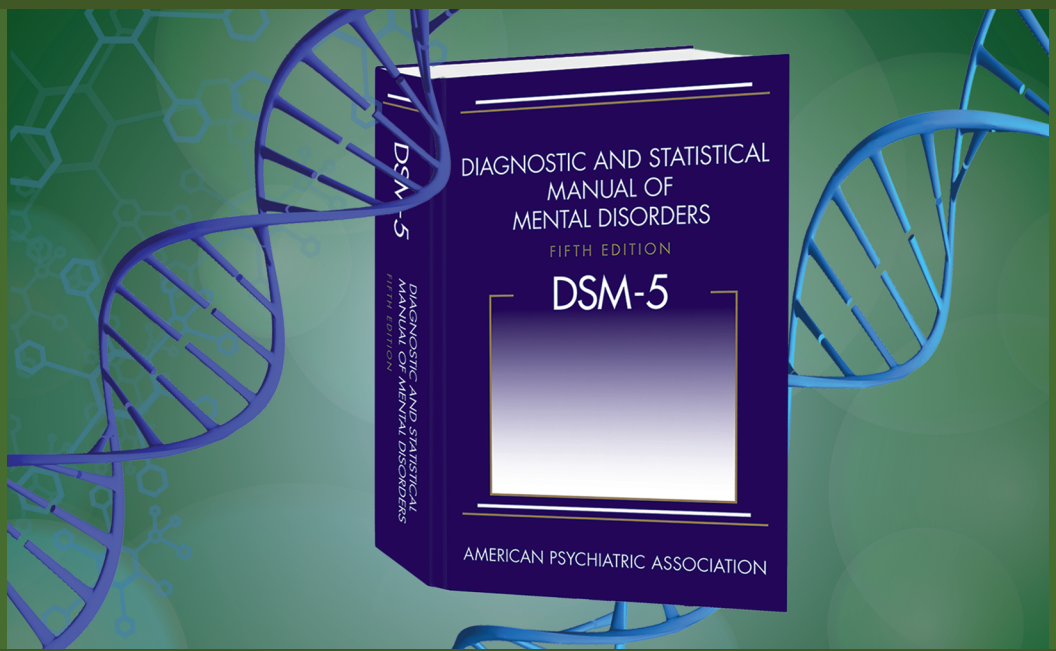

Molecules and Psychiatry

Inflammation: Depression Fans the Flames and Feasts on the Heat

Prospective Longitudinal Evaluation of the Effect of Deployment-Acquired Traumatic Brain Injury on Posttraumatic Stress and Related Disorders: Results From the Army STARRS

Molecular Mechanisms and Timing of Cortical Immune Activation in Schizophrenia

AMERICAN  
**PSYCHIATRIC**  
ASSOCIATION

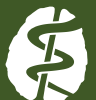

[ajp.psychiatryonline.org](http://ajp.psychiatryonline.org)
